# Supplementary material
Source: PubMed Central journal article supplement (PMC4208358)
Supplement: rsif-2014-0273-File007.pdf [file rsif-2014-0273-File007.pdf]

## **Electronic Supplementary Material (ESM)**

for

### **Underwater attachment using hairs: the functioning of spatula and sucker setae from male diving beetles**

Ying Chen<sup>1</sup>, Ming-Chih Shih<sup>1</sup>, Ming-Huang Wu<sup>1</sup>, En-Cheng Yang<sup>2</sup>, Kai-Jung Chi<sup>1, 3\*</sup>

<sup>1</sup>Department of Physics and Institute of Biophysics, National Chung Hsing University, Taichung 40227, Taiwan

<sup>2</sup>Department of Entomology, National Taiwan University, Taipei 10617, Taiwan

<sup>3</sup>Department of Life Sciences, National Chung Hsing University, Taichung 40227, Taiwan

\*To whom correspondence should be addressed. E-mail: [kjchi@phys.nchu.edu.tw](mailto:kjchi@phys.nchu.edu.tw)

#### **This document includes:**

Tables S1-S3

Captions for Supplementary Movies S1-S4

**Table S1.** Summary of information for museum specimens.

| ID# | Seta type | BA (mm <sup>2</sup> ) | Est. BM (g) | PA (mm <sup>2</sup> ) | Museum ID  | Locality                                             | Collector                 | Date           |
|-----|-----------|-----------------------|-------------|-----------------------|------------|------------------------------------------------------|---------------------------|----------------|
| 111 | circular  | 334.94                | 1.493       | 6.24                  | 4881-4045  |                                                      |                           |                |
| 112 | circular  | 408.69                | 2.019       | 6.53                  | 4881-4640  | Primorsky Krai, Sikhovskiy, Kamonsk, USSR            | O. Gorbunov & V. Sytchjov | 1991           |
| 114 | circular  | 431.51                | 2.192       | 5.34                  | 4881-4171  | Tomakomai                                            | M. Mori                   | 1986           |
| 115 | circular  | 423.05                | 2.127       | 8.59                  | 4881-4085  | Ezy Eure, France                                     | M. Monguillon             | 1959           |
| 221 | circular  | 112.17                | 0.285       | 2.26                  | 4881-1035  | Ezy Eure, France                                     | M. Monguillon             | 1959           |
| 222 | circular  | 122.28                | 0.324       | 2.36                  | 4881-1765  | Futatsu-yama Shibechea Hokkaido                      | S. Ishida                 | 1958/7/2       |
| 223 | circular  | 64.59                 | 0.123       | 0.91                  | 4881-25779 | Phuphing Palace 1400m, Doi Suthep-Pui, C. Chiang Mai | T. Yamasaki               | 1987/9/8       |
| 224 | circular  | 55.03                 | 0.097       | 1.18                  | 4881-4163  |                                                      |                           |                |
| 225 | circular  | 64.32                 | 0.123       | 1.20                  | 1282-34071 | Nau Danda (2100m)- Biletanti (1350m), Central Nepal  | M. Sakai                  | 1981/10/13     |
| 226 | circular  | 45.82                 | 0.073       | 0.53                  | 4881-13654 | Minsheng Road in Liukuei, Kaohsiung, Taiwan          | K. Ushijima               | 1977/6/10      |
| 229 | circular  | 77.95                 | 0.164       | 1.18                  | 4881-13603 | 豐富町稚内                                                | M. Mori                   | 1986/9/14      |
| 331 | circular  | 109.17                | 0.273       | 1.99                  | 446-626    |                                                      |                           |                |
| 332 | circular  | 106.17                | 0.262       | 1.69                  | 447-677    |                                                      |                           |                |
| 333 | circular  | 86.65                 | 0.193       | 1.28                  | 4881-13711 | Ohara Iriomote I. (Ryukyus)                          | Y. Hori                   | 1977/3/20      |
| 334 | circular  | 106.60                | 0.264       | 1.23                  | 4881-13753 | Ishikari-cho Hokkaido                                | M. Mori                   | 1986/10/10     |
| 335 | circular  | 39.97                 | 0.060       | 0.40                  | 4463-128   |                                                      |                           |                |
| 337 | circular  | 30.88                 | 0.040       | 0.49                  | 4881-13536 |                                                      |                           |                |
| 339 | circular  | 43.34                 | 0.067       | 0.49                  | 4881-26157 | Masuda City, Shimane Pref.                           |                           |                |
| 340 | circular  | 39.29                 | 0.058       | 0.55                  | 4881-11839 | Shikamatazawa Niigate Pref.                          | Y. Hori                   | 1982/10/12     |
| 342 | circular  | 44.86                 | 0.071       | 0.65                  | 4881-13549 | Okinawa Hegina, Maesato Ishigaki Is.                 |                           | 1975/6/16      |
| 344 | circular  | 42.58                 | 0.066       | 0.48                  | 4463-178   |                                                      |                           |                |
| 345 | circular  | 39.96                 | 0.060       | 0.52                  | 4463-941   |                                                      |                           |                |
| 346 | circular  | 39.15                 | 0.058       | 0.69                  | 4463-218   |                                                      |                           |                |
| 441 | circular  | 63.77                 | 0.121       | 0.36                  | 4881-5237  | Nau Danda (2100m)- Biletanti (1350m), Central Nepal  | M. Sakai                  | 1981/10/13     |
| 445 | circular  | 79.72                 | 0.170       | 0.61                  | 1282-34177 |                                                      |                           |                |
| 446 | circular  | 95.73                 | 0.224       | 0.96                  | 4881-11832 | Ceylon                                               | G. Lewis                  | 1881/12-1882/4 |
| 449 | circular  | 32.42                 | 0.043       | 0.47                  | 4881-1706  |                                                      |                           |                |
| 117 | spatula   | 454.77                | 2.374       | 7.50                  | 1282-34139 | 楊梅,高山頂                                               | B.-S. Chang               | 1974/7/20      |
| 118 | spatula   | 239.59                | 0.899       | 1.80                  | 4463-1481  |                                                      |                           |                |
| 119 | spatula   | 201.83                | 0.693       | 0.93                  | 4881-4160  | Tarumai Marsh Yonaguni-jima                          | M. Sato                   | 2000/3/29      |
| 120 | spatula   | 183.41                | 0.600       | 1.21                  | 4881-13622 | Ikema-jima Ryukyus                                   | M. Sato                   | 1997/12/25     |
| 227 | spatula   | 17.52                 | 0.017       | 0.13                  | 4881-12864 | Jumla (2340 m), west Nepal                           | M. Sakai                  | 1981/9/20      |
| 228 | spatula   | 52.79                 | 0.091       | 0.23                  | 4881-13217 | Yashagaiki Fukui                                     | Y. Hori                   | 1983/8/28      |
| 230 | spatula   | 74.11                 | 0.152       | 0.38                  | 4881-13634 | Gufa, 2950m, Terhathum, Nepal                        | M. Sato                   | 1979/10/28     |
| 336 | spatula   | 48.51                 | 0.080       | 0.30                  | 4881-4153  |                                                      |                           |                |
| 343 | spatula   | 43.88                 | 0.069       | 0.06                  | 4881-26132 | Phaplu, 2380m, Solukhumbu, Nepal                     | M. Sato                   | 1979/10/13     |
| 447 | spatula   | 42.73                 | 0.066       | 0.13                  | 4881-12861 | Jumla (2340 m), west Nepal                           | M. Sakai                  | 1981/9/20      |
| 448 | spatula   | 45.08                 | 0.072       | 0.21                  | 4881-25811 |                                                      |                           |                |
| 451 | spatula   | 27.90                 | 0.035       | 0.05                  | 4881-25920 |                                                      |                           |                |
| 453 | spatula   | 24.69                 | 0.029       | 0.02                  | 4881-5190  | Midoridani Gifu, Japan                               | M. Sato                   | 1972/4/30      |
| 456 | spatula   | 8.60                  | 0.006       | 0.05                  | 4881-25966 | Todai, S. Alps, Nagano                               | M. Sato                   | 1978/8/13      |

\*Only two specimens were identified: ID#225: *Hydaticus vittatus*; ID#446: *Hydaticus luzonicus* Aube

**Table S2.**

Summary and comparison of relationships among variables as shown in Figure 3.

| Y vs. X            | sample                                | <i>n</i>        | slope <i>b</i> | intercept <i>a</i> | <i>r</i> <sup>2</sup> | scaling results                                           | Data                 |
|--------------------|---------------------------------------|-----------------|----------------|--------------------|-----------------------|-----------------------------------------------------------|----------------------|
| $A_B$ vs. $M_B$    | all live subjects                     | 4 <sup>a</sup>  | 0.66           | 2.41               | 0.99                  | $b \sim 0.67$ , isometry                                  | Fig. 3a              |
| $A_P$ vs. $M_B$    | circular                              | 27              | 0.72           | 0.60               | 0.89                  | $b = 0.72 > 0.67$ , positive allometry                    | Fig. 3b <sup>c</sup> |
|                    | spatula                               | 14              | 0.87           | 0.25               | 0.84                  | $b = 0.87 > 0.67$ , positive allometry                    |                      |
| $F_a$ vs. $A_{ST}$ | <i>H. pacificus</i><br>(circular)     | 9 <sup>b</sup>  | 0.85           | 1.50               | 0.94                  | $b = 0.82 < 1$ , stress decreases w/ $A_{ST}$             | Fig. 3c <sup>d</sup> |
|                    | <i>C. rugosus</i><br>(spatula, whole) | 12 <sup>b</sup> | 1.20           | 2.00               | 0.24                  | $b \sim 0$ ( $p = 0.1287$ ); stress unrelated to $A_{ST}$ |                      |

Scaling form:  $Y = X^b + a$  (or  $\log Y = b \log X + a$ ).

$A_B$ : body area from top view;  $M_B$ : body mass;  $A_P$ : palette area;  $F_a$ : adhesive force;  $A_{ST}$ : seta area.

<sup>a</sup> For interspecific scaling, means from each species were used.

<sup>b</sup> We considered individual hairs of different sizes as independent samples. Circular samples were collected from two subjects and spatula samples were collected from six subjects.

<sup>c</sup> ANCOVA suggests significantly different OLS regression lines for circular and spatula setae. The slopes are similar ( $F_{1,37} = 1.93$ ,  $p = 0.17$ ; pooled slope = 0.78) but the intercepts are significantly different ( $F_{1,38} = 51.45$ ,  $p < 0.0001$ ).

<sup>d</sup> ANCOVA suggests a non-significant difference between OLS regression lines for circular and spatula setae (slopes:  $F_{1,16} = 0.31$ ,  $p = 0.58$ ; intercepts:  $F_{1,17} = 3.12$ ;  $p = 0.10$ ). A common regression line,  $\log F_a = 0.86 \log A_{ST} + 1.57$ , can be used to describe data from both types of setae.

**Table S3.**

Summary and comparison of attachment performance metrics between circular and spatula setae under different preloads as shown in Figure 4.

| Y vs. X                 | sample   | load type   | # trials | slope $b$ | intercept $a$ | $r^2$  | $p$      | ANCOVA results                                                                         | Data    |
|-------------------------|----------|-------------|----------|-----------|---------------|--------|----------|----------------------------------------------------------------------------------------|---------|
| $Fa/A_{ST}$ vs. preload | circular | compression | 35       | 19.33     | 35.17         | 0.67   | < 0.0001 | slopes: $F_{1,70} = 8.53, p = 0.0047$                                                  | Fig. 4a |
|                         | spatula  | compression | 39       | 51.19     | 24.63         | 0.31   | 0.0002   | OLS regressions significantly different                                                |         |
| $Fs/A_{ST}$ vs. preload | circular | shear #1    | 7        | 8.89      | 23.09         | 0.16   | 0.38     | slopes: $F_{1,9} = 0.55, p = 0.48$                                                     | Fig. 4c |
|                         |          | shear #2    | 4        | -1.22     | 32.80         | 0.004  | 0.90     | intercepts: $F_{1,10} = 0.68, p = 0.43$<br>common line: $\log Y = 5.04 \log X + 26.67$ |         |
|                         | spatula  | proximal    | 20       | 8.22      | -0.93         | 0.53   | 0.0003   | slopes: $F_{2,56} = 4.71, p = 0.0128$                                                  |         |
|                         |          | distal      | 20       | 13.67     | -0.93         | 0.46   | 0.001    | OLS regressions significantly different                                                |         |
|                         |          | lateral     | 22       | -0.77     | 10.57         | 0.0002 | 0.840    |                                                                                        |         |

Scaling form:  $Y = X^b + a$  (or  $\log Y = b \log X + a$ ).

$Fa/A_{ST}$ : adhesive force of a single seta per seta area;  $Fs/A_{ST}$ : shear resistance of a single seta per seta area.

## Captions for Supplementary Movies

**Movie S1.** Attachment-detachment process of a circular seta from male *H. pacificus* at a preload of 0.45 mN and pull-off velocity of 75  $\mu\text{m/s}$  ( $\sim 0.25 L_{\text{ST}}/\text{s}$ ). This event was filmed laterally at 24 fps and played back at its original speed. Still images at different stages are presented in Fig. 5a.

**Movie S2.** Attachment-detachment processes of a spatula seta from male *C. rugosus* at a preload of 0.35 mN and pull-off velocity of 150  $\mu\text{m/s}$  ( $\sim 0.5 L_{\text{ST}}/\text{s}$ ). This event was filmed laterally at 24 fps and played back at its original speed. Still images at different stages are presented in Fig. 5b.

**Movie S3.** Attachment-detachment process of a spatula seta from male *C. rugosus* at a preload of 0.76 mN and pull-off velocity of 75  $\mu\text{m/s}$  ( $\sim 0.25 L_{\text{ST}}/\text{s}$ ). This event was filmed proximally from the stalk side at 24 fps and played back at its original speed. Before the seta touches down, the oval sucker and parallel channels can be seen from its ventral surface. Prior to sucker-substrate separation, stalk extension and slight deformation in the sucker can be observed.

**Movie S4.** Lateral shearing of a spatula seta from male *C. rugosus* at a preload of 0.24 mN and shearing velocity of 75  $\mu\text{m/s}$  ( $\sim 0.25 L_{\text{ST}}/\text{s}$ ). This event was filmed proximally from the stalk side at 24 fps and played back at its original speed. Shortly after the sliding motion begins, the contact surface rotates until its long axis becomes parallel to the sliding direction; during pull-off, the contact surface re-orientes to its initial direction.
